# Supplementary material
Source: PubMed Central journal article supplement (PMC4822571)
Supplement: pnas.201517140SI.pdf [file pnas.201517140SI.pdf]

# Supporting Information

Fazlollahi et al. 10.1073/pnas.1517140113

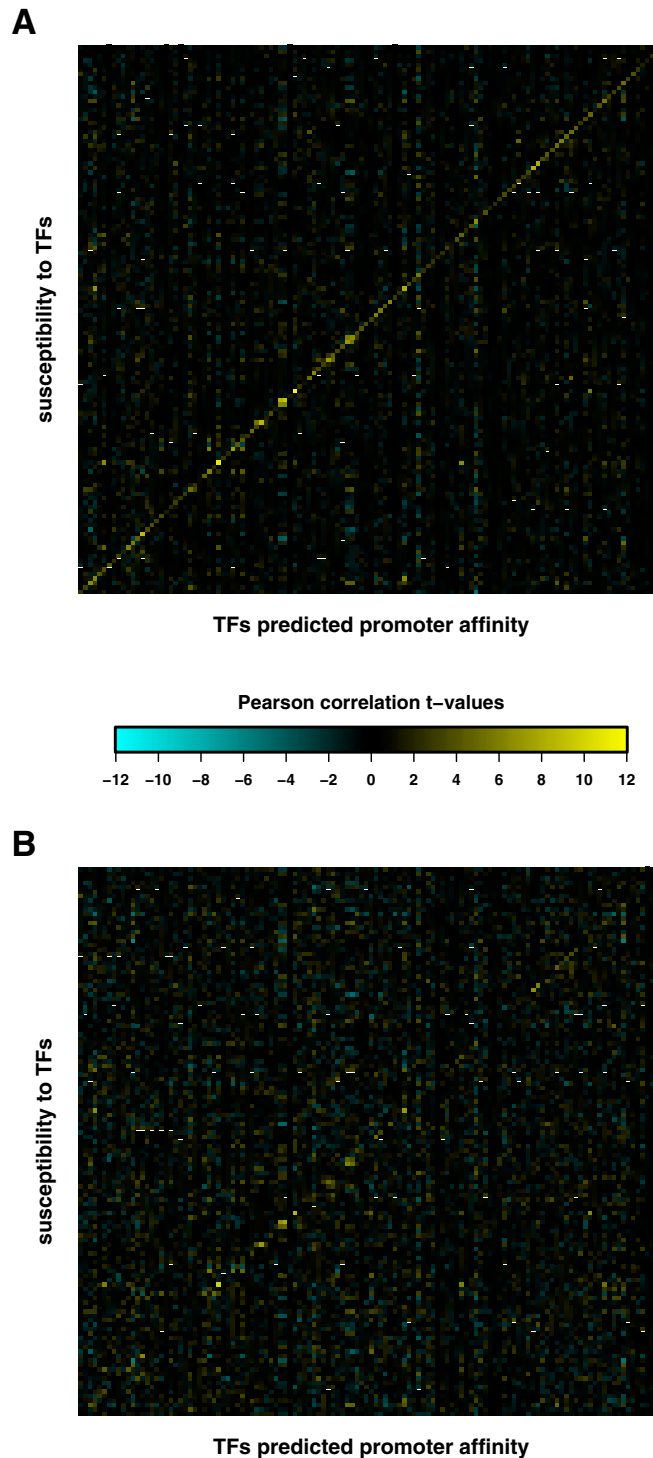

**Fig. S1.** Resolving the circularity problem for susceptibility calculation. The heat maps summarize  $t$  values of the Pearson correlation between the susceptibility signatures and promoter affinity profiles for each of the 123 different TFs. For each segregant, first the differential TF activities were obtained by applying multiple regression of differential mRNA abundance of (A) all genes and (B) all genes but leaving out one gene ( $g$ ) at a time on the TF affinity score profiles. Next, the susceptibilities of each gene ( $g$ ) were obtained by applying multiple regression of the differential mRNA abundance of  $g$  on the TF activities from A and B, separately. In B the TFs with significant  $t$  values on the diagonal correspond to the 12 TFs that pass the TF selection step for multiple regression (*Results* and *Materials and Methods*).



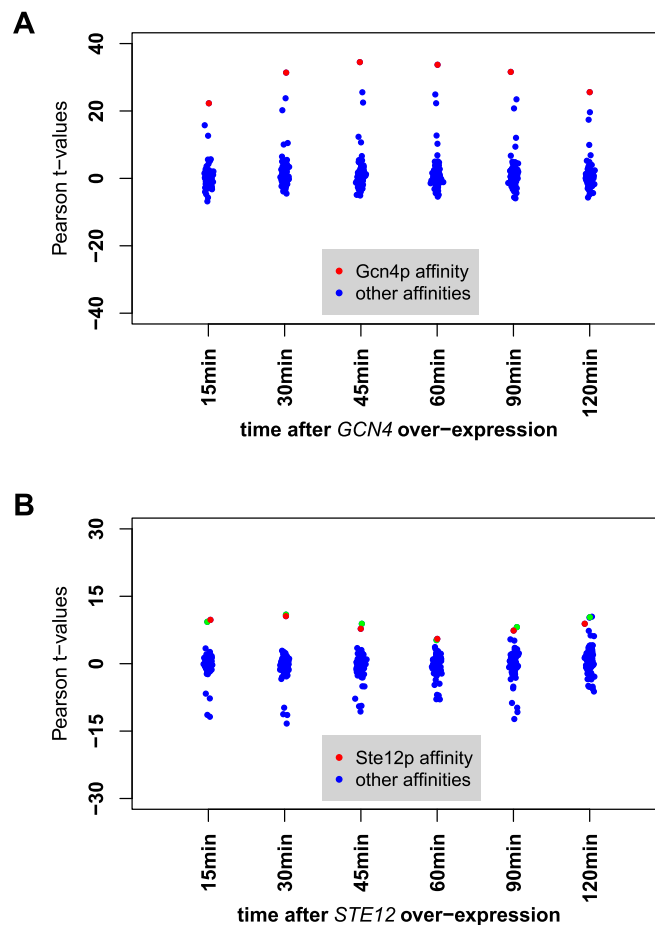

**Fig. S3.** Correlation between expression response after overexpression of *GCN4* and *STE12* and promoter affinity. The x axes represent the overexpression data at different time points. Each point corresponds to the Pearson *t* value of the correlation between the affinity profile of a particular TF and the genome-wide differential mRNA abundance for the overexpression of *GCN4* (A) and *STE12* (B). The *t* values of the correlation between the affinity profile to Gcn4p, and Ste12p are indicated in red in each relevant panel. Affinity profiles of these two TFs are exclusively correlated with the overexpression data. The green dots in B correspond to Dig1p, a known cofactor of Ste12p (21). These results demonstrate that the in vitro occupancies correlate significantly to the in vivo function of Gcn4p and Ste12p.

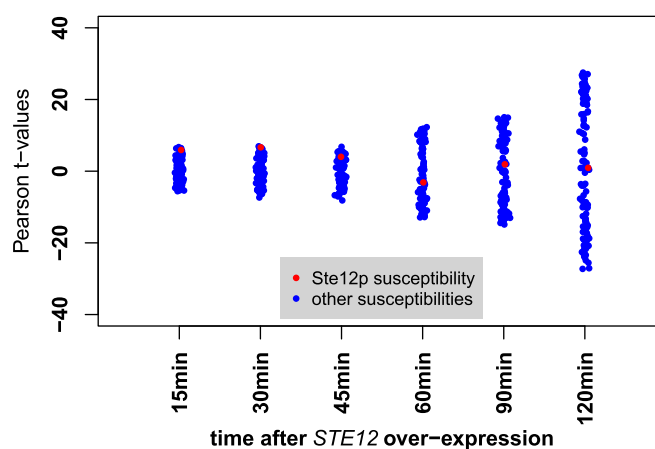

**Fig. S4.** Correlation between expression response to *STE12* overexpression and regulatory susceptibility. The x axis represents the overexpression data at different time points. Each point corresponds to the Pearson *t* value of the correlation between the susceptibility signature for a particular TF and the differential mRNA abundance in the overexpression experiment. The *t* values of the correlation to susceptibility signature for Ste12p are indicated in red in each time point column. For Ste12p, the correlation is not significant from the 30-min time point onwards (*Results*).

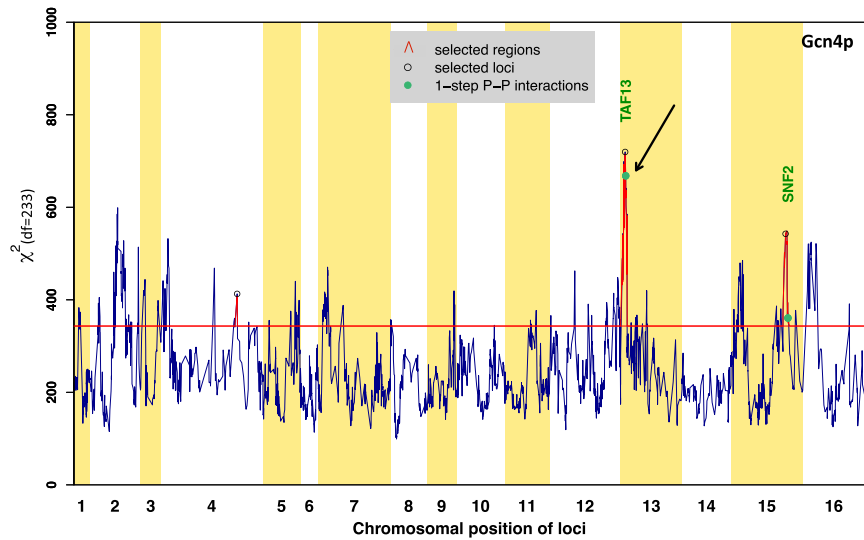

**Fig. S5.**  $\chi^2$  statistic profile obtained for Gcn4p. The analysis was performed using positive targets of Gcn4p (233 genes). We performed forward selection to detect peaks at a Bonferroni-corrected  $P$  value  $<0.01$ . The selected loci are marked with black circles. Green dots indicate the location of genes within the significant cQTL regions whose encoded protein has a direct physical interaction with Gcn4p. The horizontal red line represents the  $\chi^2$  statistic significant threshold at 1% level with Bonferroni correction. The black arrow indicates the *TAF13* locus.

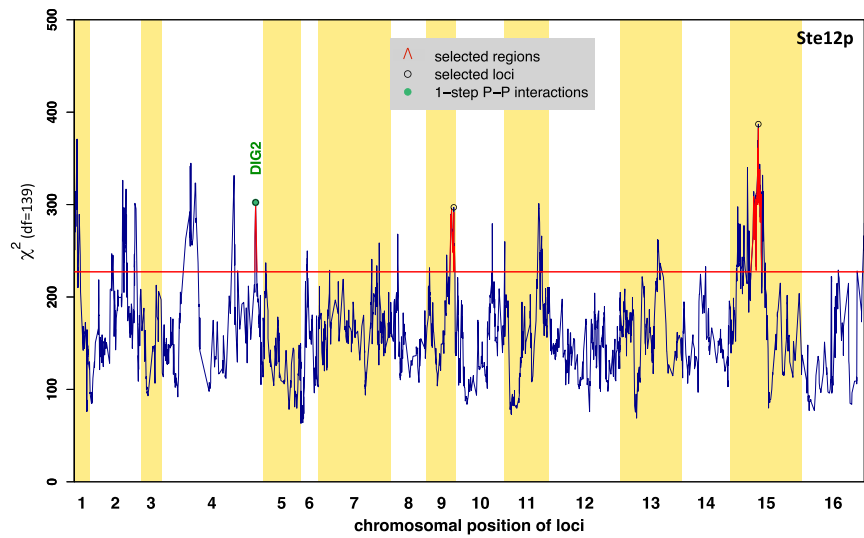

**Fig. S6.**  $\chi^2$  statistic profile obtained for Ste12p. Significant cQTL regions were detected using positive targets of Ste12p (139 genes). See Fig. S5 for annotation.

**Table S1. Comparison of identified significant cQTL and aQTL for Gcn4p and Ste12p**

| TF     | cQTL (this study)                                                            | aQTL (11)             |
|--------|------------------------------------------------------------------------------|-----------------------|
| Gcn4p  | Chr4: 1,109,730–1,149,760<br>Chr13: 27,644–99,584<br>Chr16: 779,975–880,782  | Chr2: 603,791–636,331 |
| Ste12p | Chr4: 1,407,834–1,441,485<br>Chr9: 341,217–419,417<br>Chr15: 301,078–469,462 | Chr8: 95,470–128,731  |

**Table S2. Results from the  $\beta$ -galactosidase validation experiment**

| Time            | RM 1  | RM 2  | RM 3  | BY 1   | BY 2   | BY 3   | BY<br>DIG2(RM)1 | BY<br>DIG2(RM)2 | BY<br>DIG2(RM)3 | RM<br>DIG2(BY)1 | RM<br>DIG2(RM)2 | RM<br>DIG2(BY)3 |
|-----------------|-------|-------|-------|--------|--------|--------|-----------------|-----------------|-----------------|-----------------|-----------------|-----------------|
| No alpha-factor | 642   | 719   | 861   | 3,707  | 3,673  | 3,546  | 1,855           | 1,757           | 1,834           | 716             | 771             | 789             |
| 0 min           | 775   | 736   | 785   | 4,520  | 4,558  | 4,318  | 2,592           | 2,539           | 2,519           | 637             | 705             | 667             |
| 15 min          | 756   | 777   | 786   | 20,132 | 19,500 | 19,571 | 17,690          | 17,767          | 17,864          | 792             | 776             | 751             |
| 30 min          | 1,194 | 1,221 | 1,215 | 17,693 | 19,107 | 19,795 | 32,337          | 33,057          | 31,159          | 672             | 759             | 726             |
| 60 min          | 2,293 | 2,373 | 2,506 | 21,096 | 24,116 | 25,185 | 15,863          | 18,007          | 18,264          | 739             | 693             | 701             |

**Dataset S1. GO category enrichment analysis for inferred susceptibility signatures of seven selected TFs**

[Dataset S1](#)
